# Supplementary material for: A reverse transcriptase ribozyme
Source: eLife. 2017 Sep 26;6:e31153. doi: 10.7554/eLife.31153 (PMC5665644; doi:10.7554/eLife.31153)
Supplement: Figure 2—figure supplement 1—source data 1. [file elife-31153-fig2-figsupp1-data1.xlsx]

## Sheet: Figure 2—S1
A Reverse Transcriptase Ribozyme
B. Samanta & G.F. Joyce
Figure 2—figure supplement 1
High-resolution MS/MS analysis of reverse transcription product
template 4, RNA primer
mass (Da)	raw intensity	intensity 10E4
261.196	41.8741	0.00418741
304.373	21.0829	0.00210829
332.36	45.4057	0.00454057
335.149	161	0.0161
336.047	265.993	0.0265993
336.051	222.757	0.0222757
382.258	63.8104	0.00638104
407.304	72.5604	0.00725604
410.258	41.8497	0.00418497
412.48	60.1422	0.00601422
422.859	70.8694	0.00708694
436.375	14.2173	0.00142173
451.835	42.4166	0.00424166
467.05	1612.83	0.161283
491.061	2167.44	0.216744
507.056	8165.32	0.816532
521.457	8.28122	0.000828122
555.13	10516.2	1.05162
591.446	62.8328	0.00628328
646.61	1433.64	0.143364
651.109	17264.8	1.72648
670.939	40.0734	0.00400734
672.193	38.4376	0.00384376
672.134	261.489	0.0261489
674.105	167.196	0.0167196
680.367	134.002	0.0134002
688.357	9.67127	0.000967127
688.161	23.2048	0.00232048
692.411	119.509	0.0119509
692.39	60.3699	0.00603699
699.909	23.2903	0.00232903
715.075	118.105	0.0118105
760.303	60.1726	0.00601726
763.778	62.1991	0.00621991
766.393	111.451	0.0111451
796.102	8145.12	0.814512
799.651	1850.46	0.185046
801.881	91.832	0.0091832
820.114	7966.38	0.796638
831.144	65.0031	0.00650031
835.829	75.8699	0.00758699
836.109	1137.34	0.113734
851.805	62.0493	0.00620493
854.061	0.509533	5.09533e-05
864.478	113.535	0.0113535
878.458	59.0129	0.00590129
891.132	293.71	0.029371
907.286	14213.5	1.42135
909.303	264.625	0.0264625
916.606	3.96495	0.000396495
946.597	51.2278	0.00512278
949.323	29.4826	0.00294826
953.144	123.665	0.0123665
955.647	9.27109	0.000927109
976.841	1.42758	0.000142758
980.161	35981.5	3.59815
984.268	8.47541	0.000847541
987.823	16.6902	0.00166902
988.268	53.9787	0.00539787
993.483	27.3889	0.00273889
1031.65	165.226	0.0165226
1051.83	146.668	0.0146668
1055.03	107.946	0.0107946
1057.16	223.16	0.022316
1057.28	802.669	0.0802669
1056.91	0.393333	3.93333e-05
1057.91	114.954	0.0114954
1062.17	167.483	0.0167483
1068.79	9.80055	0.000980055
1068.17	196.403	0.0196403
1069.79	301.201	0.0301201
1072.29	73.7699	0.00737699
1108.49	1914.99	0.191499
1108.54	582.141	0.0582141
1116.16	100.766	0.0100766
1126.16	247.221	0.0247221
1130.51	97.7673	0.00977673
1134.32	292.912	0.0292912
1136.16	128.333	0.0128333
1139.17	112.487	0.0112487
1138.17	130.953	0.0130953
1146.17	322.854	0.0322854
1149.17	12004.1	1.20041
1158.17	95.5635	0.00955635
1160.18	23.1172	0.00231172
1163.67	401.07	0.040107
1165.18	281.372	0.0281372
1180.37	188.293	0.0188293
1189.34	274.001	0.0274001
1212.18	487.005	0.0487005
1237.52	154.695	0.0154695
1293.22	50601.8	5.06018
1438.21	1810.4	0.18104
1441.74	113.433	0.0113433
1461.22	493.051	0.0493051
1478.22	3439.28	0.343928
1599.3	6102.63	0.610263
1622.27	53334	5.3334
1711.27	511.728	0.0511728
1729.62	183.341	0.0183341
1767.26	7857.83	0.785783
1800.27	7052.98	0.705298
1870.35	216.613	0.0216613
1871.36	960.489	0.0960489
1912.29	75.985	0.0075985
1920.98	24.493	0.0024493
1944.35	8815.44	0.881544
1951.32	71321.4	7.13214
2024.33	1136.09	0.113609
2040.32	87.1861	0.00871861
2070.64	161.055	0.0161055
2071.3	293.194	0.0293194
2079.32	63.4333	0.00634333
2080.32	698.688	0.0698688
2095.32	1049.82	0.104982
2102.32	380.207	0.0380207
2104.06	237.103	0.0237103
2106.67	20.3868	0.00203868
2113.33	7169.62	0.716962
2116.32	556.037	0.0556037
2119.48	192.159	0.0192159
2122.32	82.5376	0.00825376
2128.32	8.2386	0.00082386
2129.33	2312.58	0.231258
2138.34	138.07	0.013807
2139.59	208.621	0.0208621
2141.75	17.0363	0.00170363
2148.08	626.274	0.0626274
2147.83	149.319	0.0149319
2151.33	1529.45	0.152945
2158.09	287.382	0.0287382
2162.33	137.046	0.0137046
2163.33	0.246966	2.46966e-05
2164.34	129.219	0.0129219
2169.43	3626.08	0.362608
2216.99	361.624	0.0361624
2218.32	1400.23	0.140023
2241.11	114.99	0.011499
2249.39	7775.56	0.777556
2263.37	4421.08	0.442108
2263.02	49.8763	0.00498763
2264.38	60846.8	6.08468
2265.38	165.688	0.0165688
2284.34	356.96	0.035696
2290.34	276	0.0276
2311.36	73.5897	0.00735897
2327.35	344.451	0.0344451
2329.36	170.399	0.0170399
2345.36	1314.73	0.131473
2356.15	93.562	0.0093562
2362.34	90.4989	0.00904989
2380.69	384.048	0.0384048
2424.37	767.508	0.0767508
2439.38	206.623	0.0206623
2440.38	121.097	0.0121097
2441.38	21.8649	0.00218649
2442.38	5240.32	0.524032
2477.05	113.169	0.0113169
2554.41	147.674	0.0147674
2555.42	7139.2	0.71392
2593.43	33182.9	3.31829
2643.38	683.489	0.0683489
2651.39	625.986	0.0625986
2669.45	2764.93	0.276493
2693.37	72.9737	0.00729737
2731.43	5960.02	0.596002
2747.42	955.31	0.095531
2853.42	142.585	0.0142585
2864.93	126.966	0.0126966
2881.47	293.496	0.0293496
2883.47	481.11	0.048111
2882.48	36645.3	3.66453
2884.48	499.639	0.0499639
2920.45	476.774	0.0476774
2921.45	571.325	0.0571325
2942.44	654.315	0.0654315
2955.44	401.184	0.0401184
2963.47	64.957	0.0064957
2998.49	240.524	0.0240524
3077.48	307.2	0.03072
3109.54	6552.04	0.655204
3131.56	982.334	0.0982334
3188.5	26.8262	0.00268262
3189.51	8691.76	0.869176
3327.49	1038.26	0.103826
3384.51	71.9323	0.00719323
3394.03	460.038	0.0460038
3395.03	5114.83	0.511483
3483.53	745.365	0.0745365
3495.53	14721.7	1.47217
3572.53	393.964	0.0393964
3609.56	1293.35	0.129335
3638.06	431.548	0.0431548
3648.55	320.369	0.0320369
3659.56	124.798	0.0124798
3715.58	397.991	0.0397991
3824.59	4011.83	0.401183
4110.7	1151.13	0.115113
4129.63	5354.52	0.535452
4130.63	331.628	0.0331628
4150.1	176.809	0.0176809
4226.64	2976.73	0.297673
4233.64	348.097	0.0348097
4250.14	181.003	0.0181003
4277.15	494.752	0.0494752
4278.15	445.944	0.0445944
4287.17	518.67	0.051867
4294.66	1345.97	0.134597
4302.66	2023.76	0.202376
4323.64	10.0307	0.00100307
4459.69	321.874	0.0321874
4653.69	251.789	0.0251789
4654.69	46.0785	0.00460785
4684.76	332.162	0.0332162
4763.72	14789.1	1.47891
4861.71	5.37219	0.000537219
4933.59	1157.53	0.115753
5108.77	3670.41	0.367041
5222.8	1016.88	0.101688
5226.83	371.962	0.0371962
5302.76	904.29	0.090429
5303.73	157.06	0.015706
5406.58	174.303	0.0174303
5595.8	895.091	0.0895091
5596.8	36.9356	0.00369356
5689.85	1089.19	0.108919
5690.86	397.226	0.0397226
5705.85	10669	1.0669
5706.85	5650.09	0.565009
5729.85	9399.55	0.939955
5742.85	3972.96	0.397296
5743.85	369.796	0.0369796
5822.89	2317.65	0.231765
5823.9	799.619	0.0799619
5839.9	370.165	0.0370165
5840.9	112346	11.2346
5841.9	8332.2	0.83322
6016.89	203.688	0.0203688
6018.9	1560.01	0.156001
6019.91	88.4246	0.00884246
6034.89	8163.7	0.81637
6035.9	146.076	0.0146076
6058.91	3549.51	0.354951
6059.91	445.811	0.0445811
6150.94	88.2697	0.00882697
6151.94	318.028	0.0318028
6168.95	308.887	0.0308887
6169.95	68281.5	6.82815
6170.95	134.586	0.0134586
6213.9	85.8647	0.00858647
6307.95	4655.35	0.465535
6308.96	467.167	0.0467167
6319.02	342.628	0.0342628
6323.94	9679.14	0.967914
6324.94	6500.04	0.650004
6348.95	1103.03	0.110303
6347.96	10243.4	1.02434
6458.99	132282	13.2282
6652.99	1920.36	0.192036
6651.99	437.225	0.0437225
6677.01	3982.02	0.398202
6678.01	1647.66	0.164766
6770.02	821.713	0.0821713
6787.04	4510.92	0.451092
6788.04	65962.2	6.59622
6789.06	2489.44	0.248944
6930.09	222.631	0.0222631
6950.06	2603.66	0.260366
6951.06	289.177	0.0289177
6966.05	4318.64	0.431864
6967.06	2590.61	0.259061
6989.06	1151.09	0.115109
6990.07	5489.94	0.548994
7082.08	375.088	0.0375088
7101.1	32601.9	3.26019
7100.11	79.1188	0.00791188
7117.1	778.499	0.0778499
7118.1	1878.31	0.187831
7124.07	37.3693	0.00373693
7142.05	176.241	0.0176241
7143.06	44.3601	0.00443601
7274.12	434.627	0.0434627
7275.12	1377.41	0.137741
7278.1	778.614	0.0778614
7279.11	3523.04	0.352304
7280.11	953.481	0.0953481
7296.1	2379.31	0.237931
7295.1	4791.48	0.479148
7319.12	2511	0.2511
7320.12	1719.41	0.171941
7429.15	8145.84	0.814584
7430.16	40628.9	4.06289
7472.11	684.002	0.0684002
7473.12	1819.49	0.181949
7496.12	240.861	0.0240861
7588.02	62.4133	0.00624133
7609.15	408.319	0.0408319
7759.21	2091.79	0.209179
7936.23	209.842	0.0209842
7937.23	1866.09	0.186609
7967.15	513.678	0.0513678
8072.27	16770.2	1.67702
8088.27	398.086	0.0398086
8167.24	318.304	0.0318304
8168.24	1358.31	0.135831
8318.29	2033.38	0.203338
8421.26	664.814	0.0664814
8436.27	2064.14	0.206414
8437.27	10790.4	1.07904
8453.27	7427.51	0.742751
8461.27	2446.77	0.244677
8462.28	1004.38	0.100438
8466.28	243.553	0.0243553
8477.28	11244.3	1.12443
8478.28	337.304	0.0337304
8493.27	1646.39	0.164639
8492.27	556.953	0.0556953
8501.29	90.9838	0.00909838
8502.3	1274.74	0.127474
8553.31	325.713	0.0325713
8554.31	144.241	0.0144241
8571.32	18713.2	1.87132
8572.33	39786	3.9786
8587.32	22589.8	2.25898
8587.91	166.684	0.0166684
8588.32	127542	12.7542
8604.31	40517.8	4.05178
8605.32	11919	1.1919
8612.33	58852.9	5.88529
8627.32	2553.05	0.255305
8628.33	44358.1	4.43581
8651.33	268.905	0.0268905
8652.34	1882.73	0.188273
8695.33	704.306	0.0704306
